# Supplementary figures and images for: The mTORC1-mediated activation of ATF4 promotes protein and glutathione synthesis downstream of growth signals
Source: eLife journal article supplement (doi:10.7554/elife.63326), 2021-03-01

Figure 1—figure supplement 1

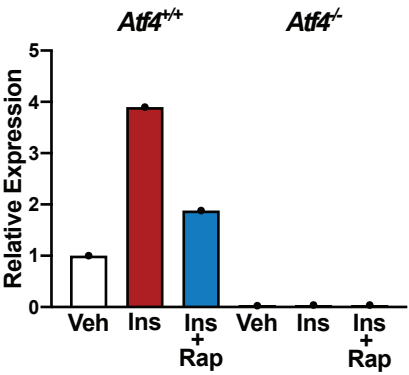

Supplement: supp [file elife_poa_e63326_Figure_1_figure_supplement_1.pdf › elife_poa_e63326_Figure_1_figure_supplement_1.pdf]

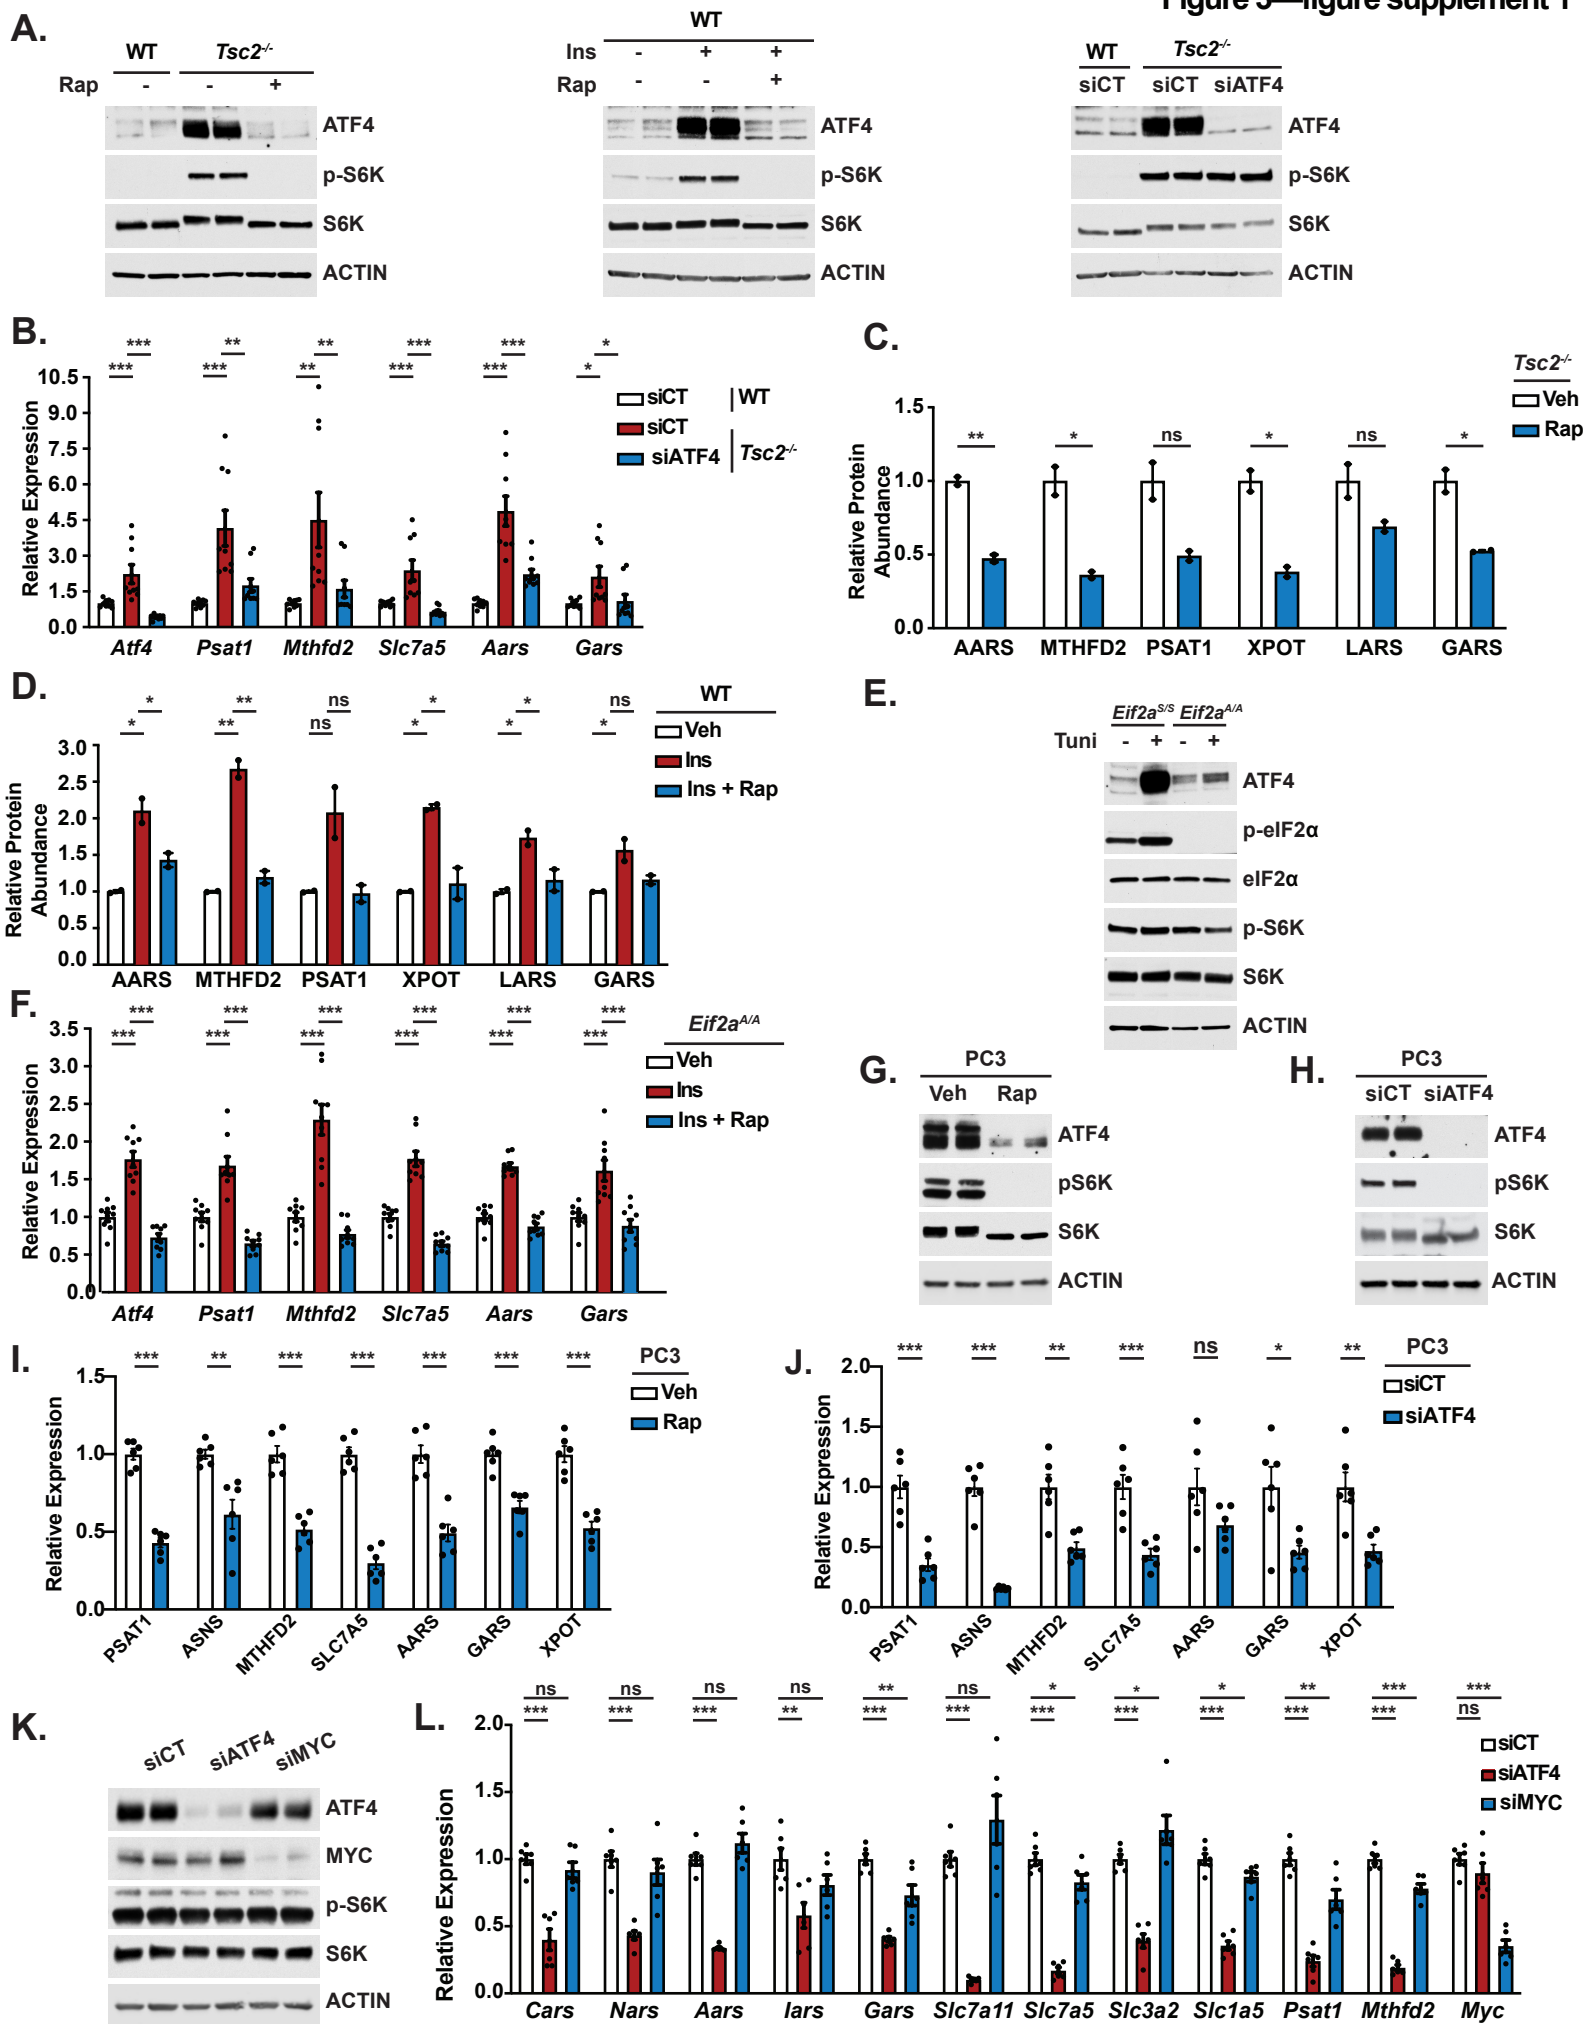

Supplement: supp [file elife_poa_e63326_Figure_3_figure_supplement_1.pdf › elife_poa_e63326_Figure_3_figure_supplement_1.pdf]

Figure 4—figure supplement 1

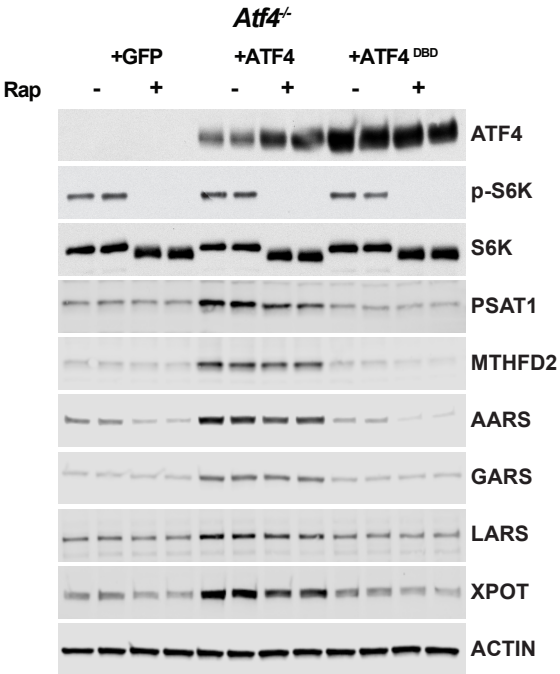

Supplement: supp [file elife_poa_e63326_Figure_4_figure_supplement_1.pdf › elife_poa_e63326_Figure_4_figure_supplement_1.pdf]

Figure 5—figure supplement 1

A.

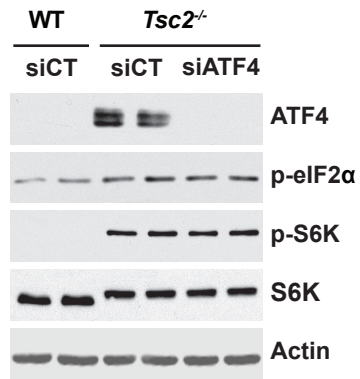

B.

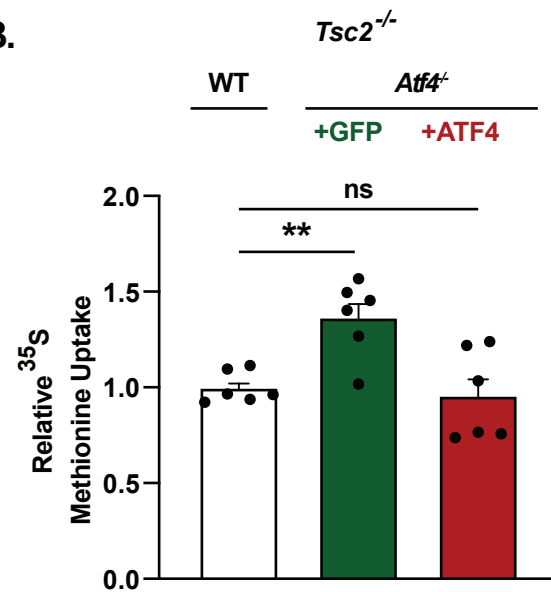

C.

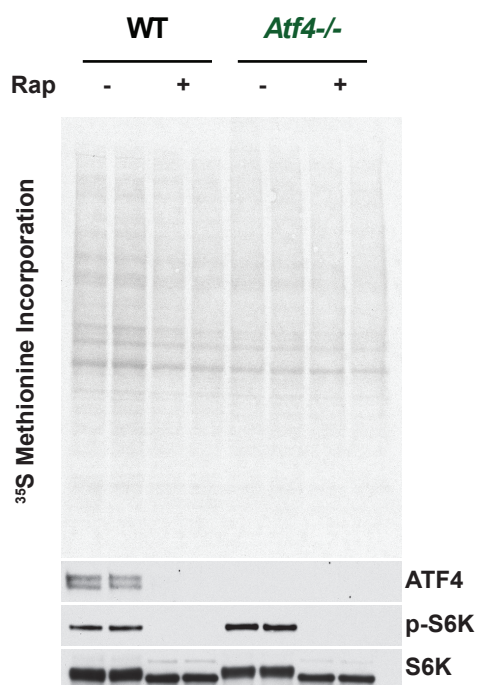

D.

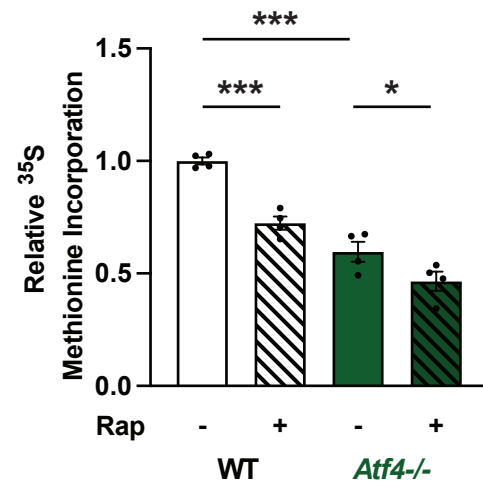

Supplement: supp [file elife_poa_e63326_Figure_5_figure_supplement_1.pdf › elife_poa_e63326_Figure_5_figure_supplement_1.pdf]

Figure 6—figure supplement 1

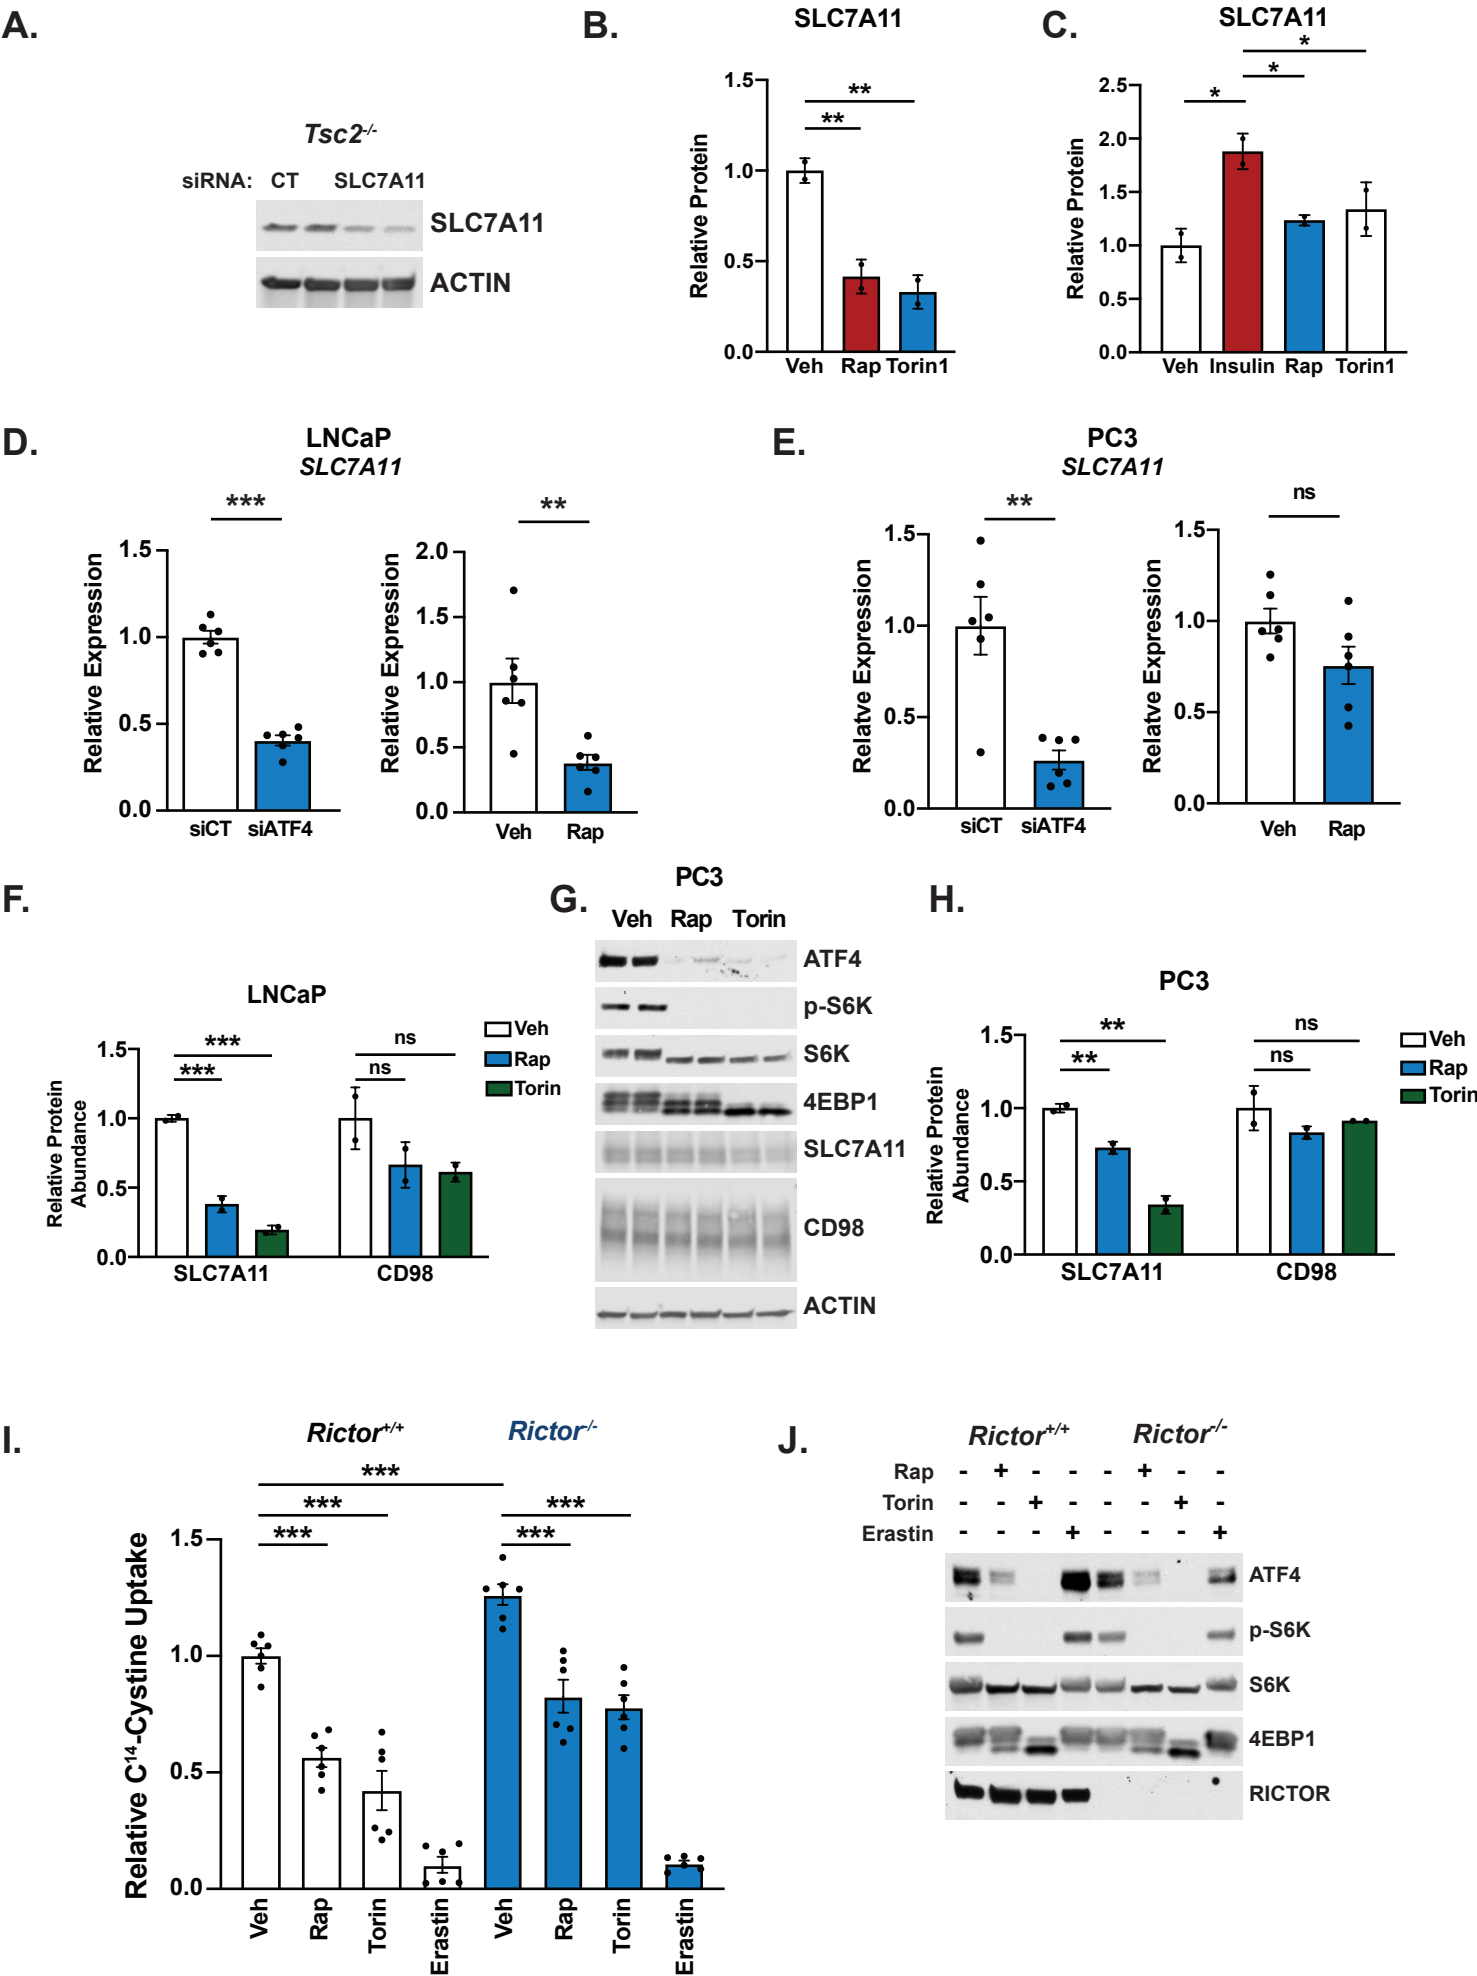

Supplement: supp [file elife_poa_e63326_Figure_6_figure_supplement_1.pdf › elife_poa_e63326_Figure_6_figure_supplement_1.pdf]

Figure 7— figure supplement 1

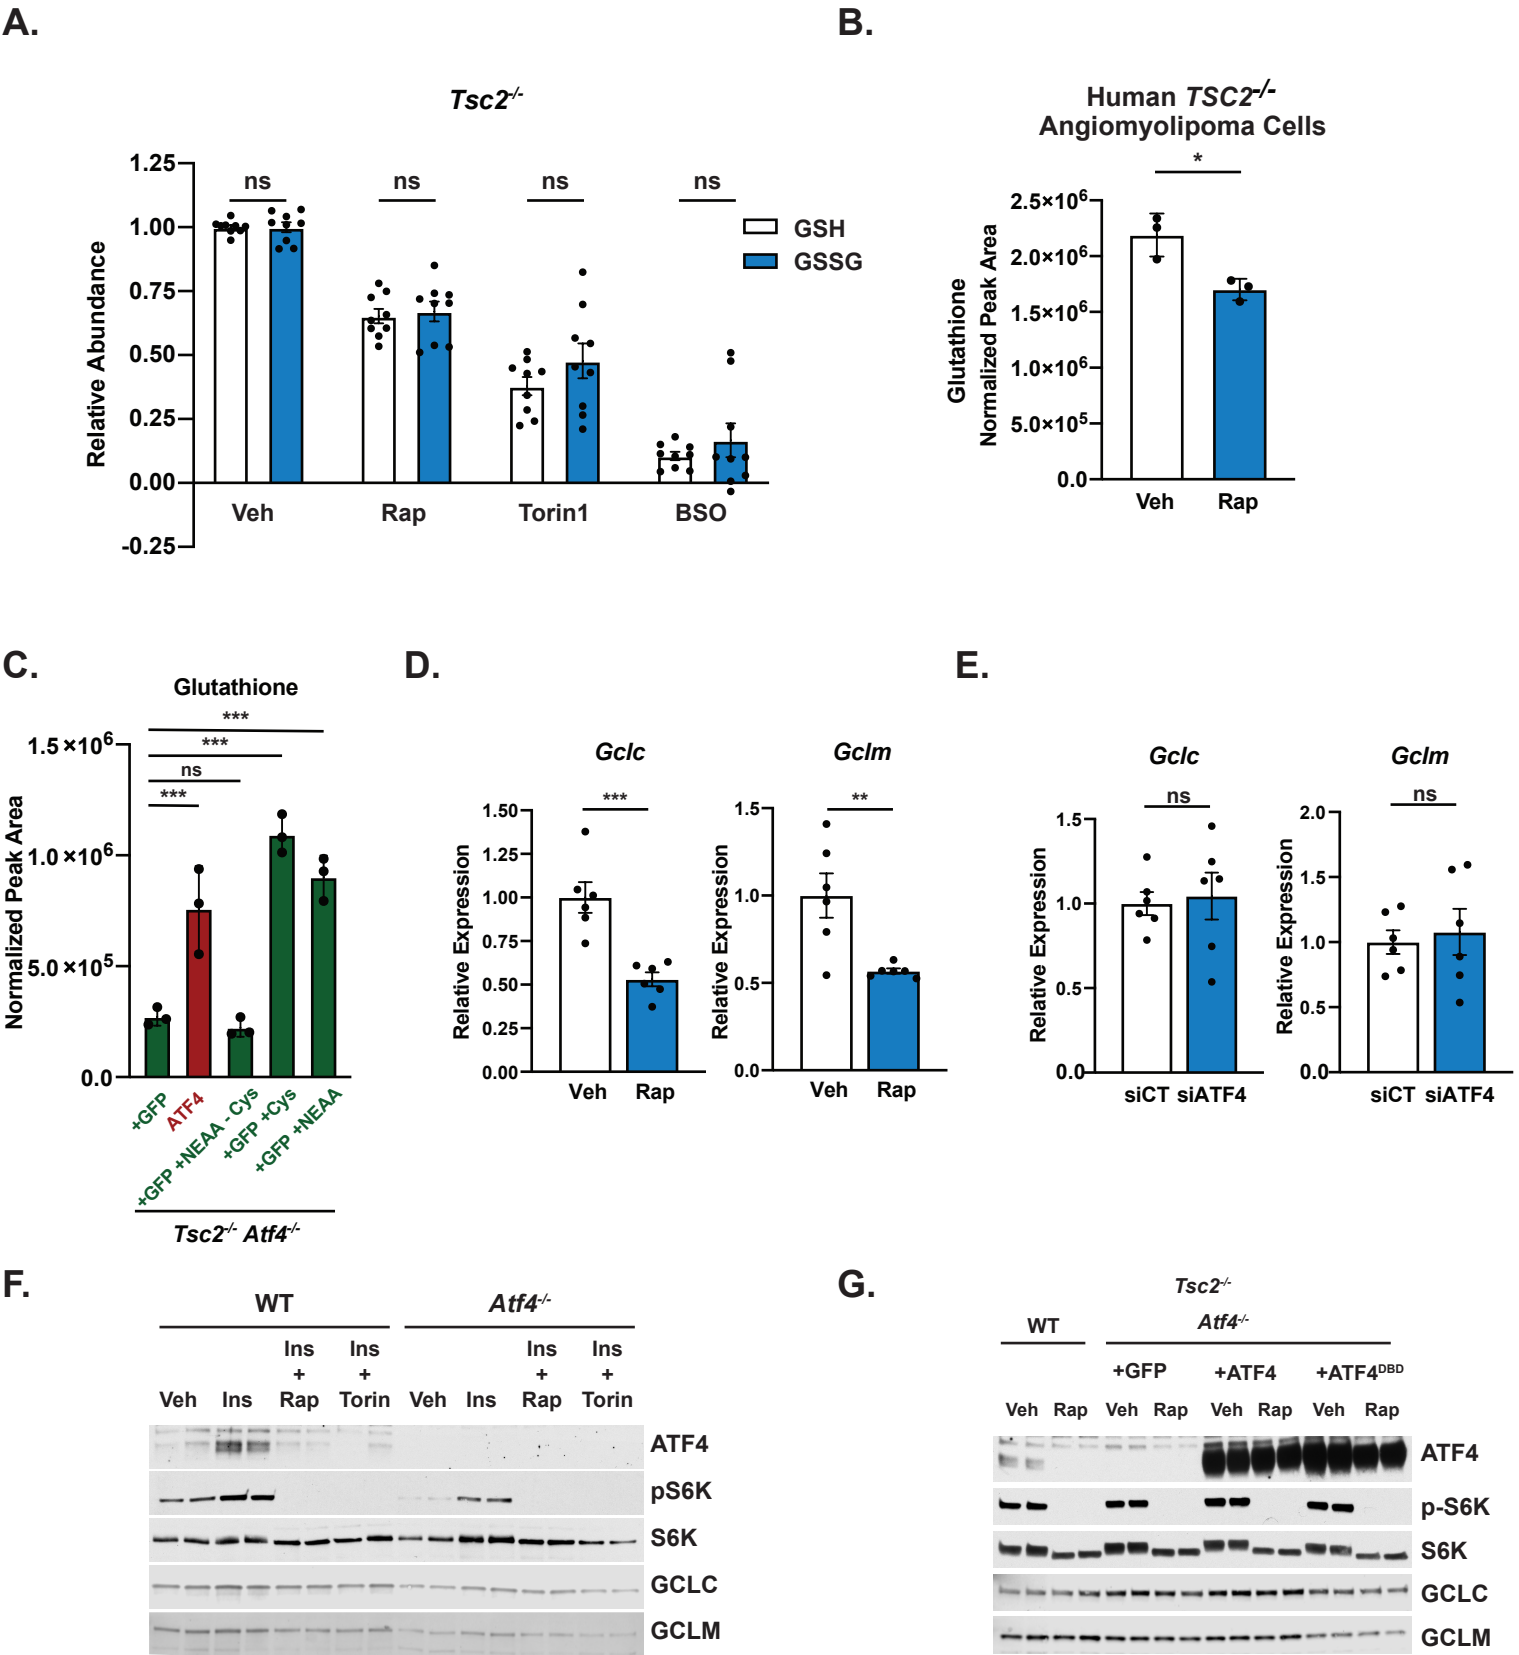

Supplement: supp [file elife_poa_e63326_Figure_7_figure_supplement_1.pdf › elife_poa_e63326_Figure_7_figure_supplement_1.pdf]
